# Supplementary material for: Polymorphism and photoluminescence in a naphthalene-based ligand, and its supramolecular structures through second-sphere coordination with the [CoCl4]2− anion
Source: Royal Society of Chemistry journal article supplement (doi:10.1039/c3ra22748k), 2013-01-01
Supplement: c3ra22748k.pdf [file c3ra22748k.pdf]

# Polymorphism and photoluminescence in naphthalene-based ligand, and its supramolecular structures through second - sphere coordination with $[\text{CoCl}_4]^{2-}$ anion<sup>†‡</sup>

Lei Li,<sup>a</sup> Yan-Qing Fu,<sup>a</sup> Fang Guo,<sup>a\*</sup> Ji Gao,<sup>a</sup> Jian Tong<sup>a</sup> and Zhong-Fu Zhou<sup>b,c\*</sup>

<sup>a</sup> College of Chemistry, Liaoning University, Shenyang 110036, China.

E-mail: fguo@lnu.edu.cn. Fax: 0086 24 62202380, Tel: 0086 24 62207831.

<sup>b</sup> Key Laboratory for Material Microstructures, Shanghai University, Shanghai 200444, China

<sup>c</sup> Institute of Mathematics and Physics, Aberystwyth University, Aberystwyth SY23 3BZ, UK

Email: [zzz@aber.ac.uk](mailto:zzz@aber.ac.uk), [z.zhou@shu.edu.cn](mailto:z.zhou@shu.edu.cn)

**Table S1.** Crystallization of L1 in different conditions.

| Solvents                  | Conditions                            | Form                                                 |
|---------------------------|---------------------------------------|------------------------------------------------------|
| Dichloromethane + ethanol | hexanedioic acid                      | $\alpha$ (a large amount) + $\beta$ (a small amount) |
| Dichloromethane + ethanol | 5% boric acid                         | $\alpha$ (a large amount) + $\beta$ (a small amount) |
| Dichloromethane + ethanol | +5% boric acid + 10% $\text{NaClO}_4$ | $\alpha$                                             |
| Dichloromethane + ethanol | Aniline                               | $\alpha$                                             |
| Dichloromethane + ethanol | Pyridine                              | $\alpha$                                             |

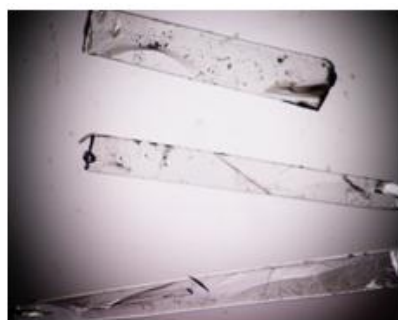

(a)

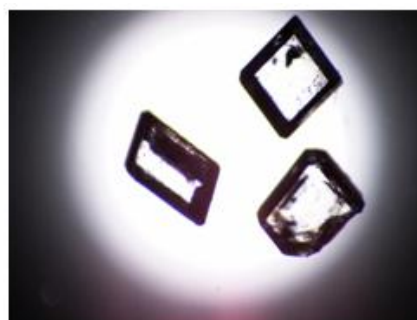

(b)

Fig. S1 Crystal of two polymorphs: (a)  $\alpha$  and (b)  $\beta$

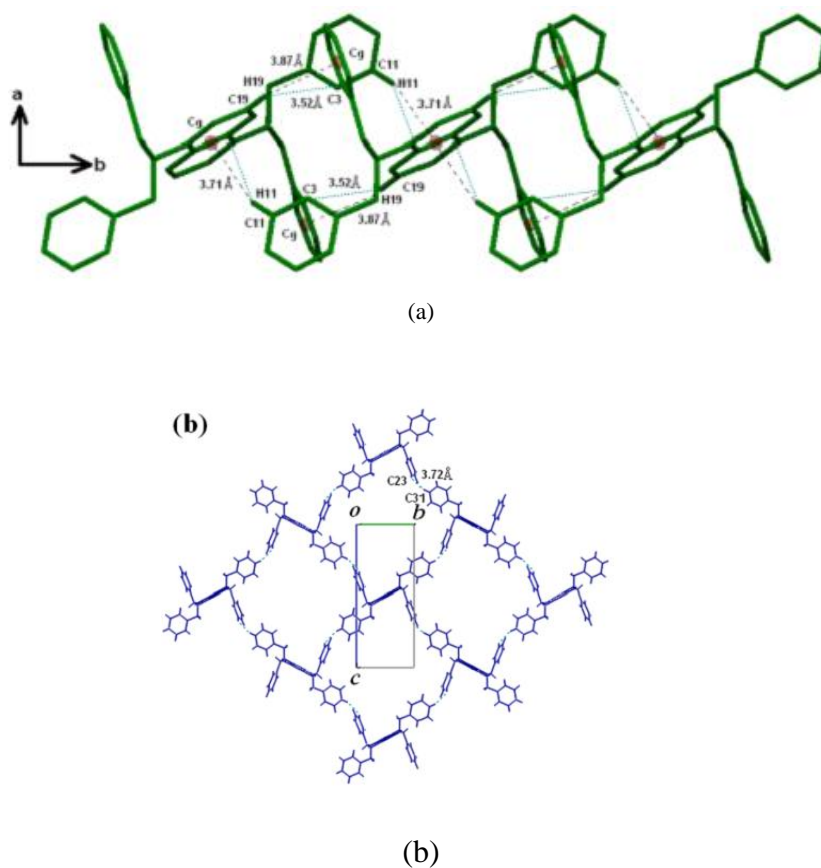

Fig.S2 (a) Two types of C-H... $\pi$  interactions in molecule 1 of polymorph  $\alpha$ , involving the aromatic rings of adjacent molecules; (b) Every four molecule 2 of polymorph  $\alpha$  form a circled network involving extensive C-H... $\pi$  interactions, and further extended into a layer along b-c plane.

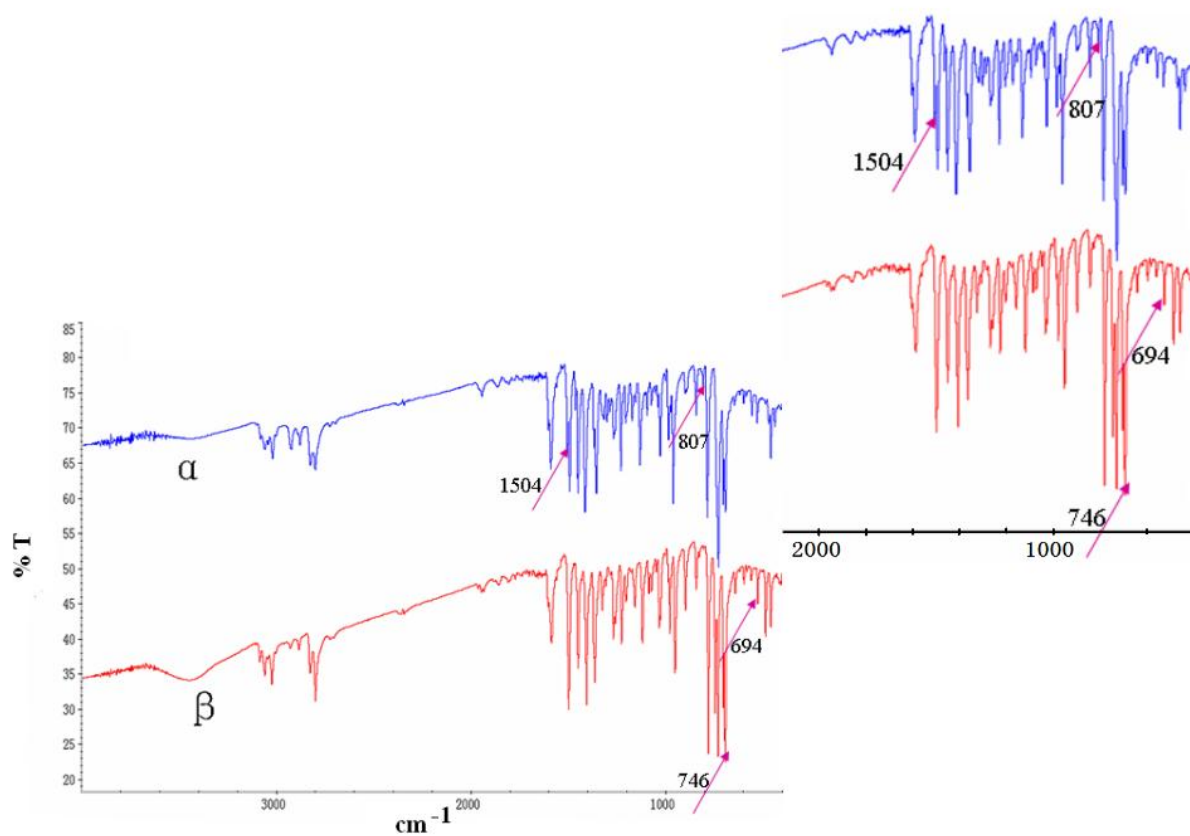

Fig. S3 IR spectra of the two polymorphs. The IR absorption bands 1350-1000  $\text{cm}^{-1}$  are characteristic for the C-N stretching vibration. The absorption bands 1600-1450  $\text{cm}^{-1}$  are assigned to C=C skeletal vibration of benzene and naphthalene. The absorption bands 3100-3000  $\text{cm}^{-1}$  and 880-680  $\text{cm}^{-1}$  are the stretching vibration and bending vibration of C-H of benzene and naphthalene. The absorption bands 2926-2800  $\text{cm}^{-1}$  are assigned to C-H stretching vibration of  $-\text{CH}_2$ .

**Table S2.** Hydrogen bonding in the crystal structures of two polymorphs and the inclusion complexes.

|                            | <b>D...A(Å)</b> | <b>H...A (Å)</b> | <b>D-H...A (°)</b> |
|----------------------------|-----------------|------------------|--------------------|
| <b>β</b>                   |                 |                  |                    |
| C8-H8...Cg(C9-C14)         | 3.491 (1)       | 2.647 (1)        | 143.2 (1)          |
| (x,y,-1+z)                 |                 |                  |                    |
| C11-H11...C3 (1+x,y, -1+z) | 3.518 (1)       | 2.785 (1)        | 134.5 (1)          |
| <b>α</b>                   |                 |                  |                    |
| C19-H19...C3(1-x,1-y,1-z)  | 3.520 (1)       | 2.839 (1)        | 129.4 (1)          |
| C11-H11...Cg(C15-C19)      | 3.717 (1)       | 2.812 (1)        | 159.6 (1)          |
| (1-x,1-y,1-z)              |                 |                  |                    |
| C20-H20B...C14             | 3.687 (1)       | 2.855 (1)        | 142.1(1)           |
| (-x,1-y,1-z)               |                 |                  |                    |
| <b>Crystal 1</b>           |                 |                  |                    |
| C2-H2...Cg (C26-C31)       | 3.287(1)        | 2.644(1)         | 126.8(1)           |
| N1-H1N...Cl2 (1+x,y,z)     | 3.183(1)        | 2.321(1)         | 158.1(1)           |
| N2-H2N....Cl4 (x,y,z)      | 3.191(1)        | 2.315(1)         | 154.2(1)           |
| (2-x, 1-y,-z)              |                 |                  |                    |
| <b>Crystal 2</b>           |                 |                  |                    |
| N1-H1...Cl1 (1-x, -y, -z)  | 3.252(1)        | 2.344(1)         | 147.4(1)           |
| N2-H2...Cl2 (-x,1-y,1-z)   | 3.418(1)        | 2.562(1)         | 156.0(1)           |
